# Supplementary material
Source: PubMed Central journal article supplement (PMC3663071)

$^1\text{H}$  NMR

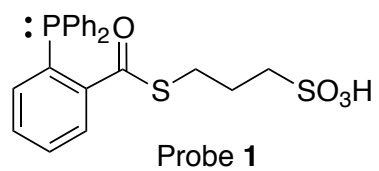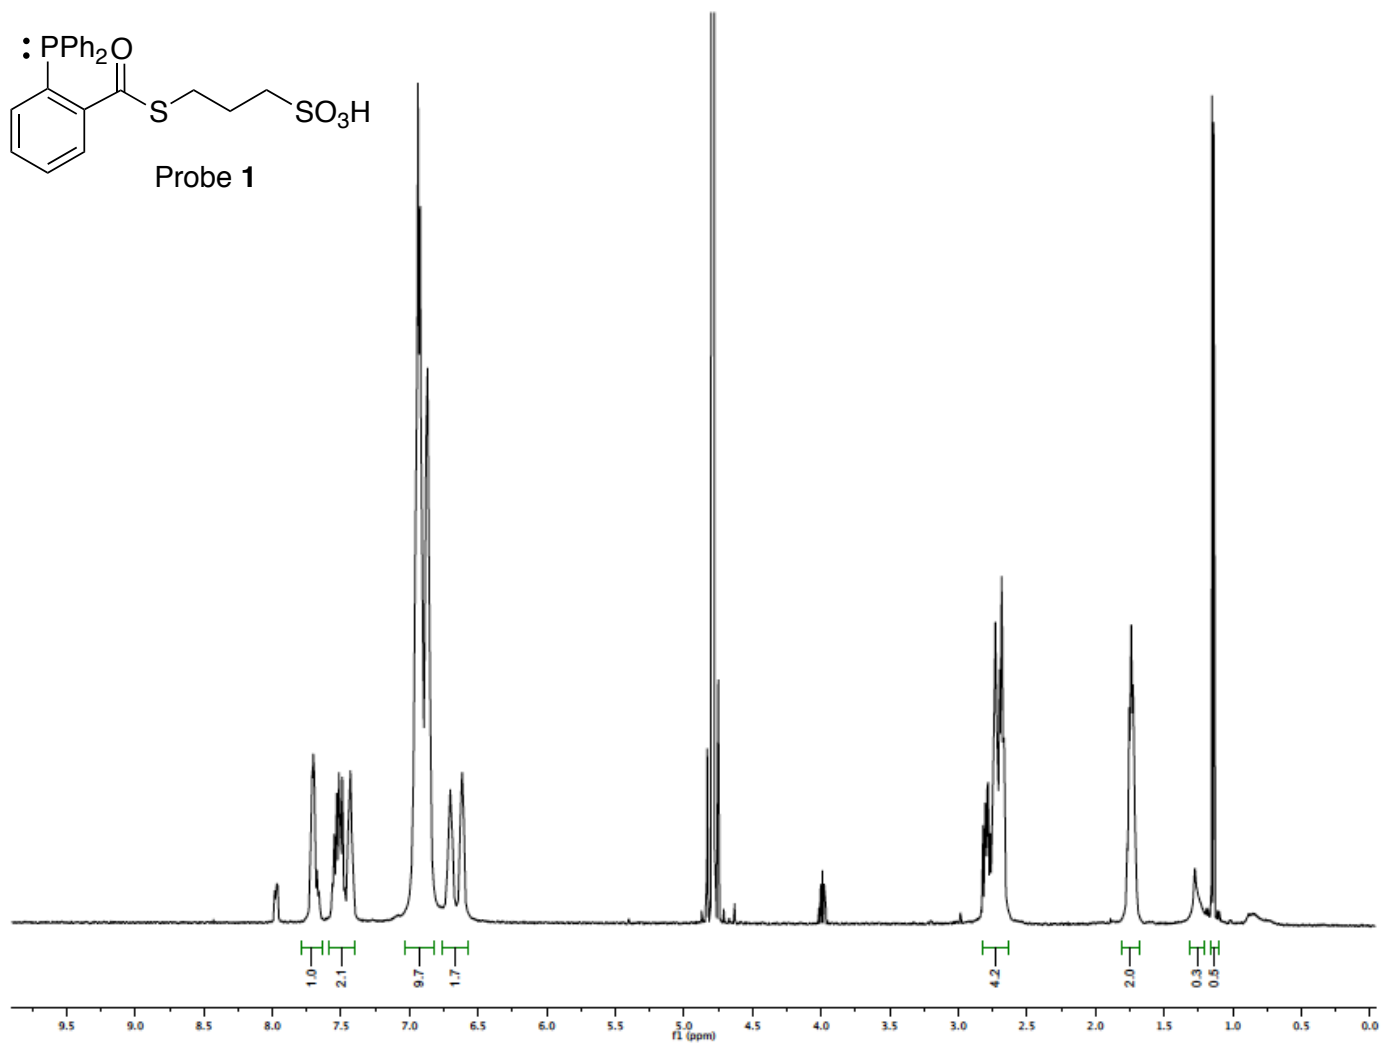

$^{13}\text{C}$  NMR

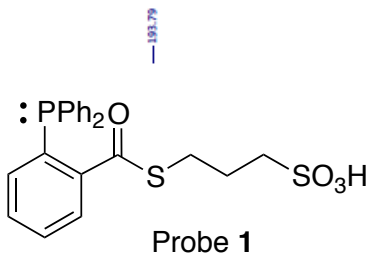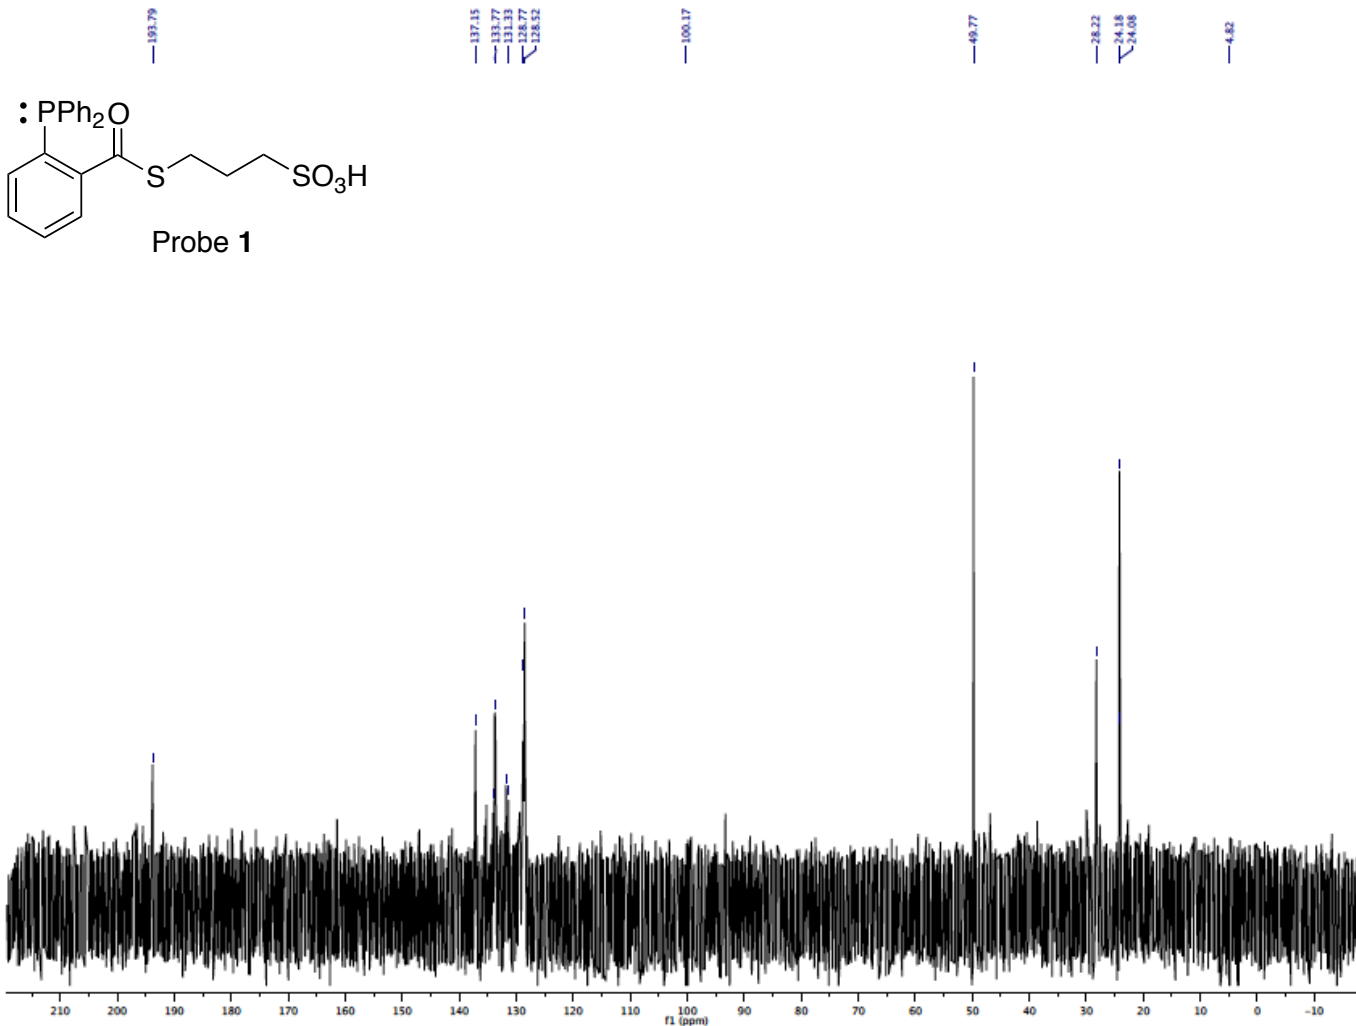

$^{31}\text{P}$  NMR

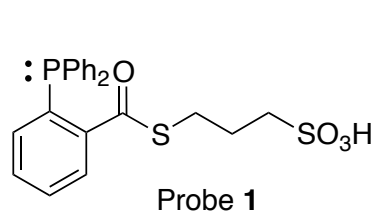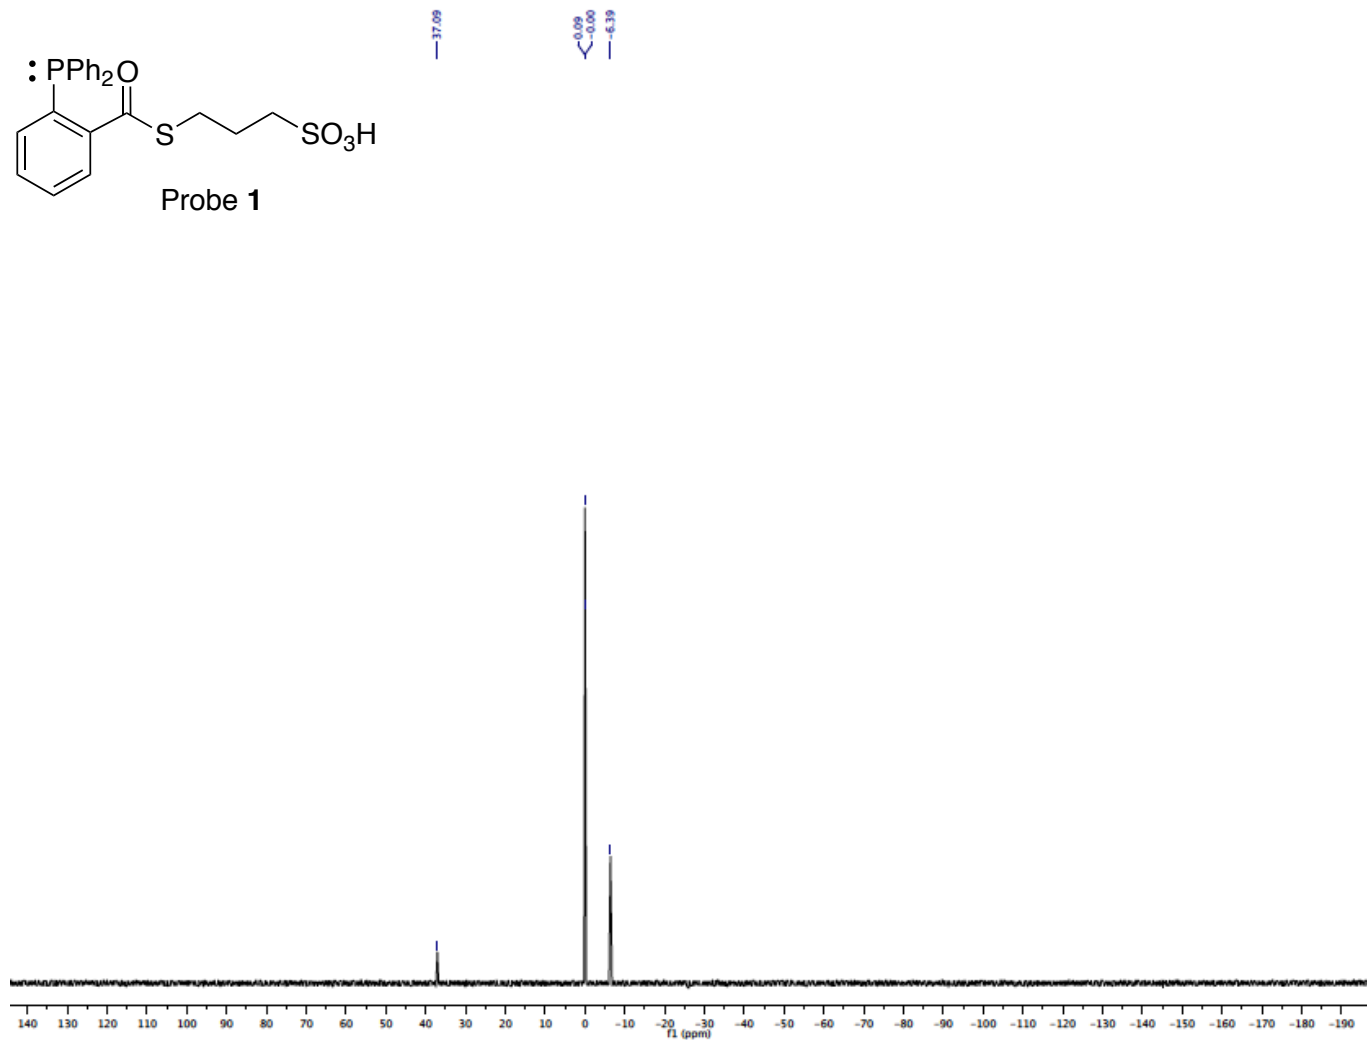

$^1\text{H}$  NMR

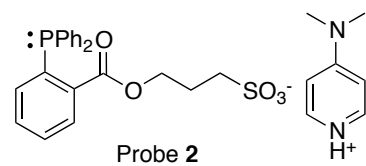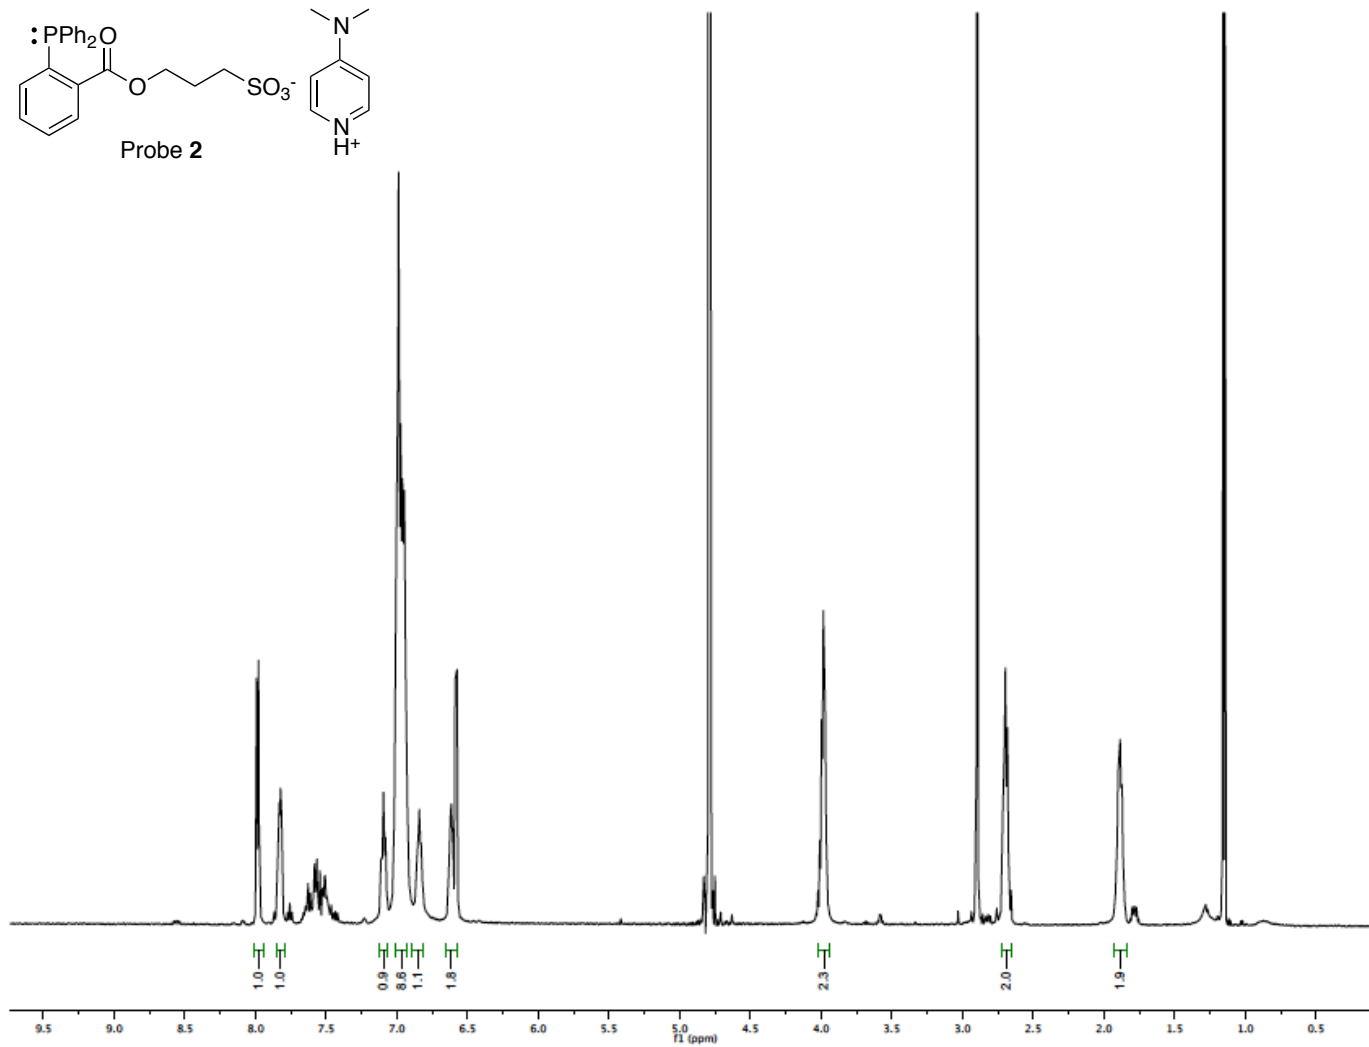

$^{13}\text{C}$  NMR

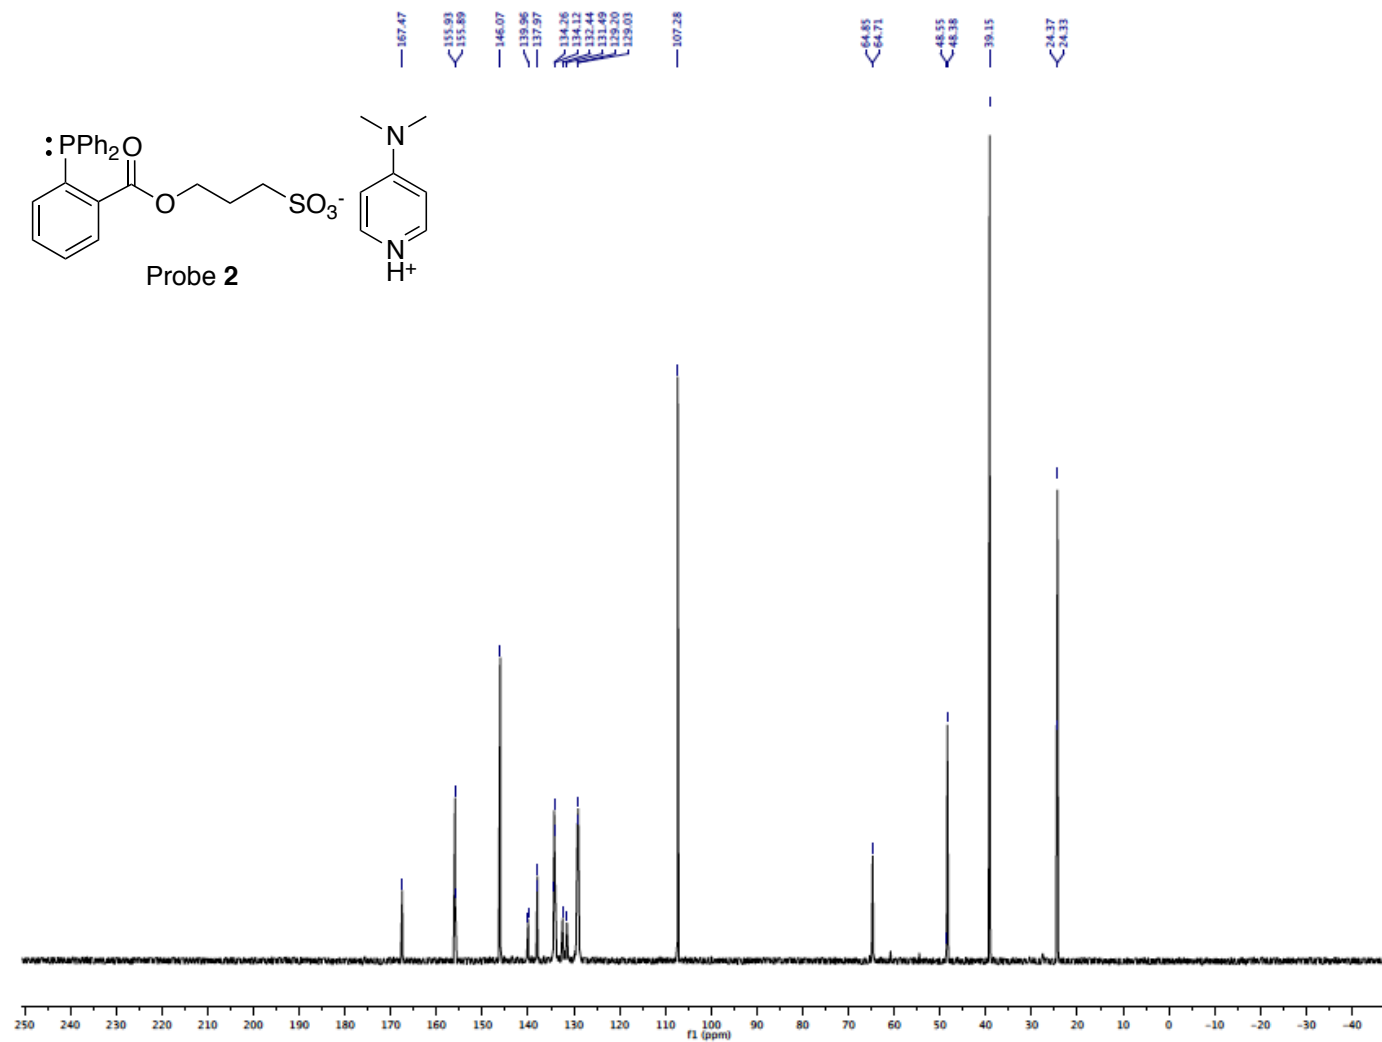

$^{31}\text{P}$  NMR

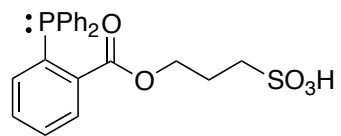

Probe 2

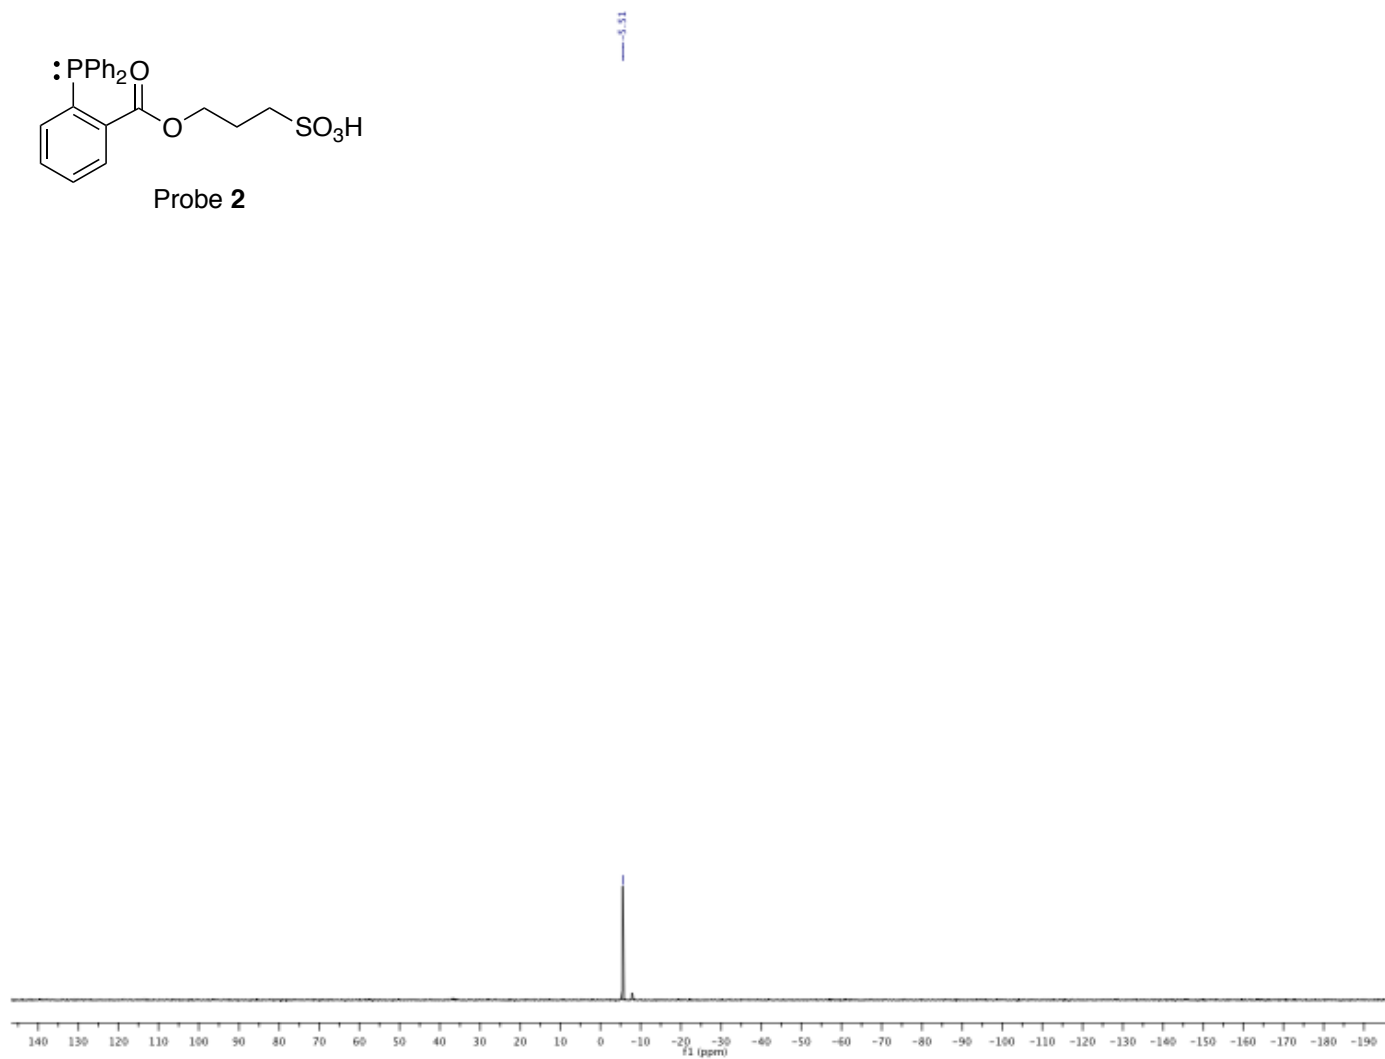

$^1\text{H}$  NMR

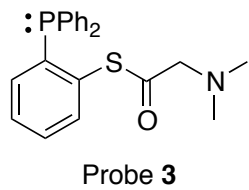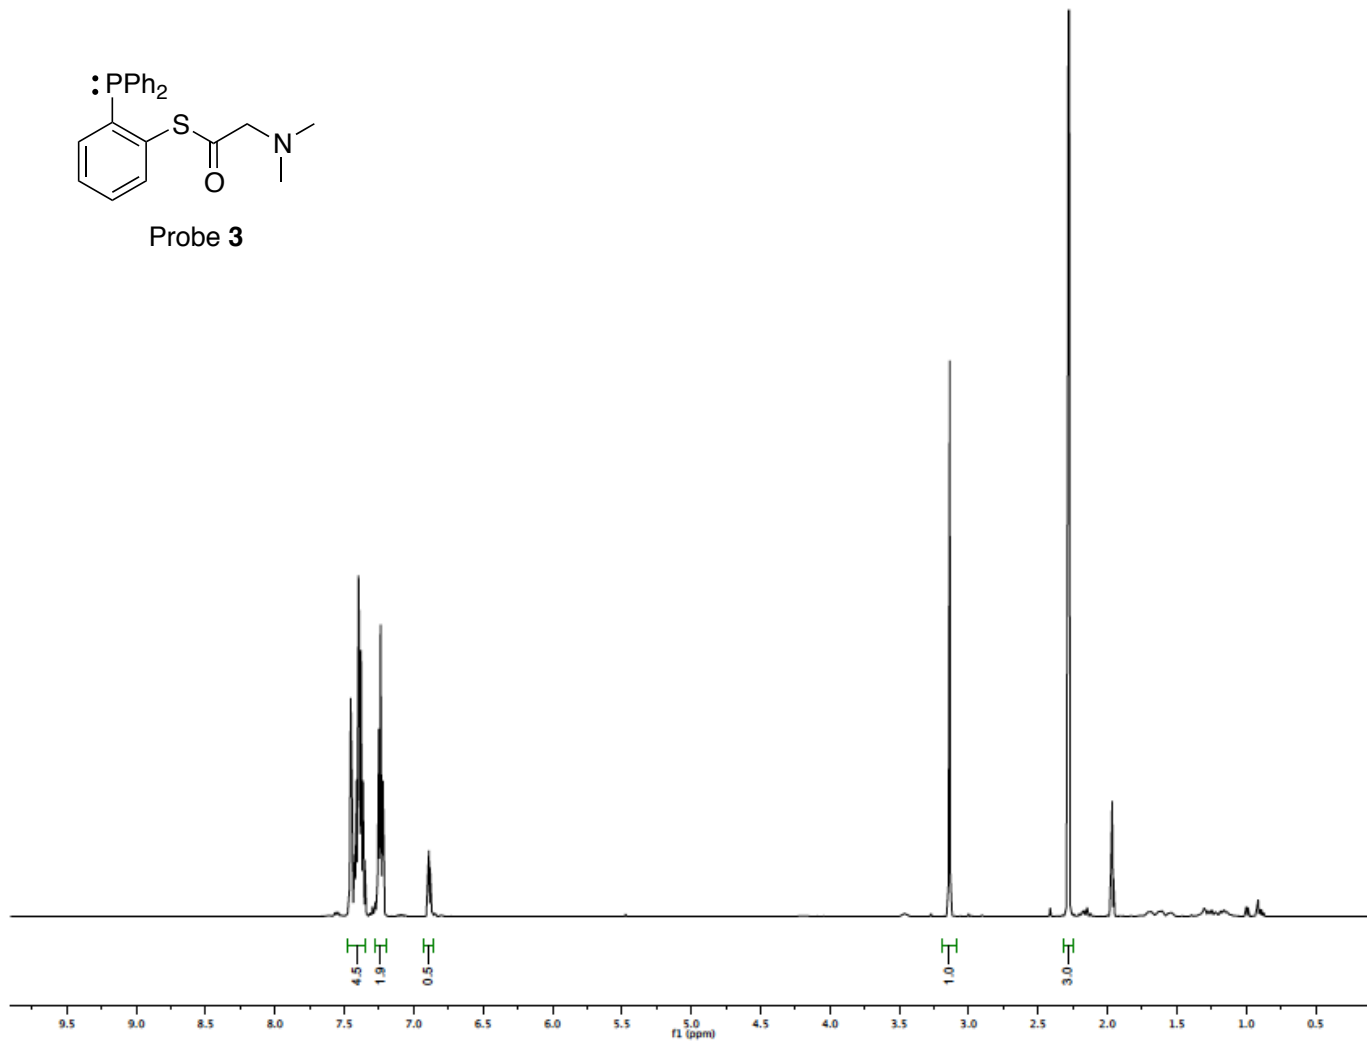

$^{13}\text{C}$  NMR

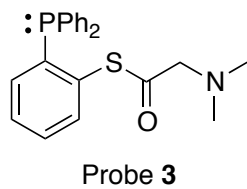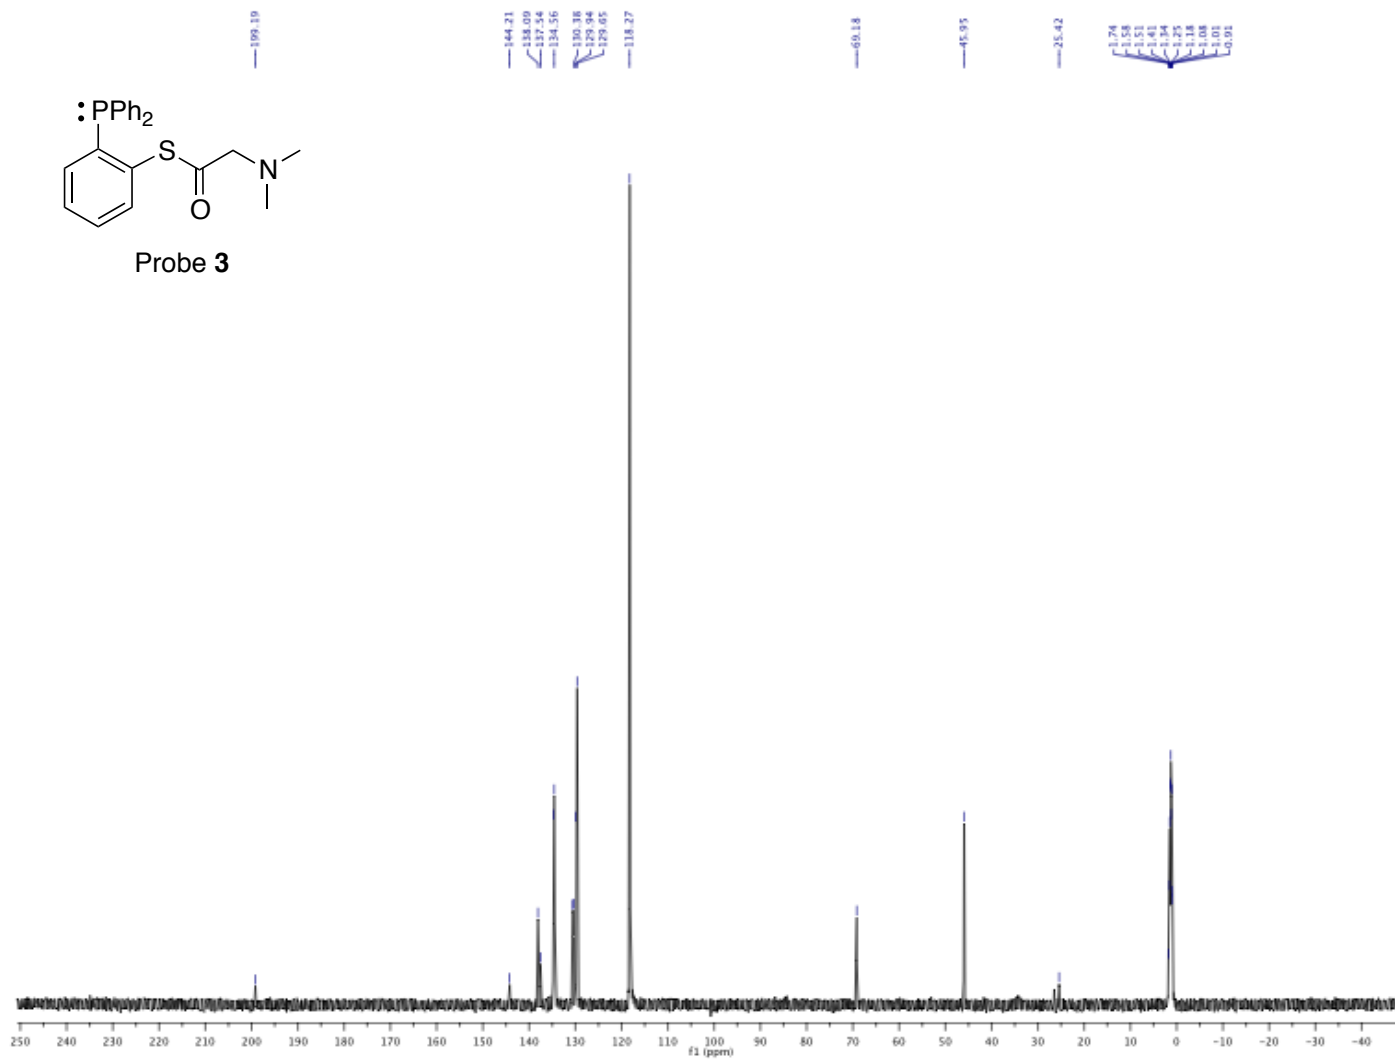



$^{31}\text{P}$  NMR

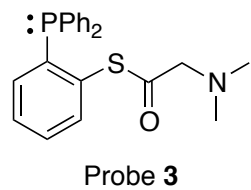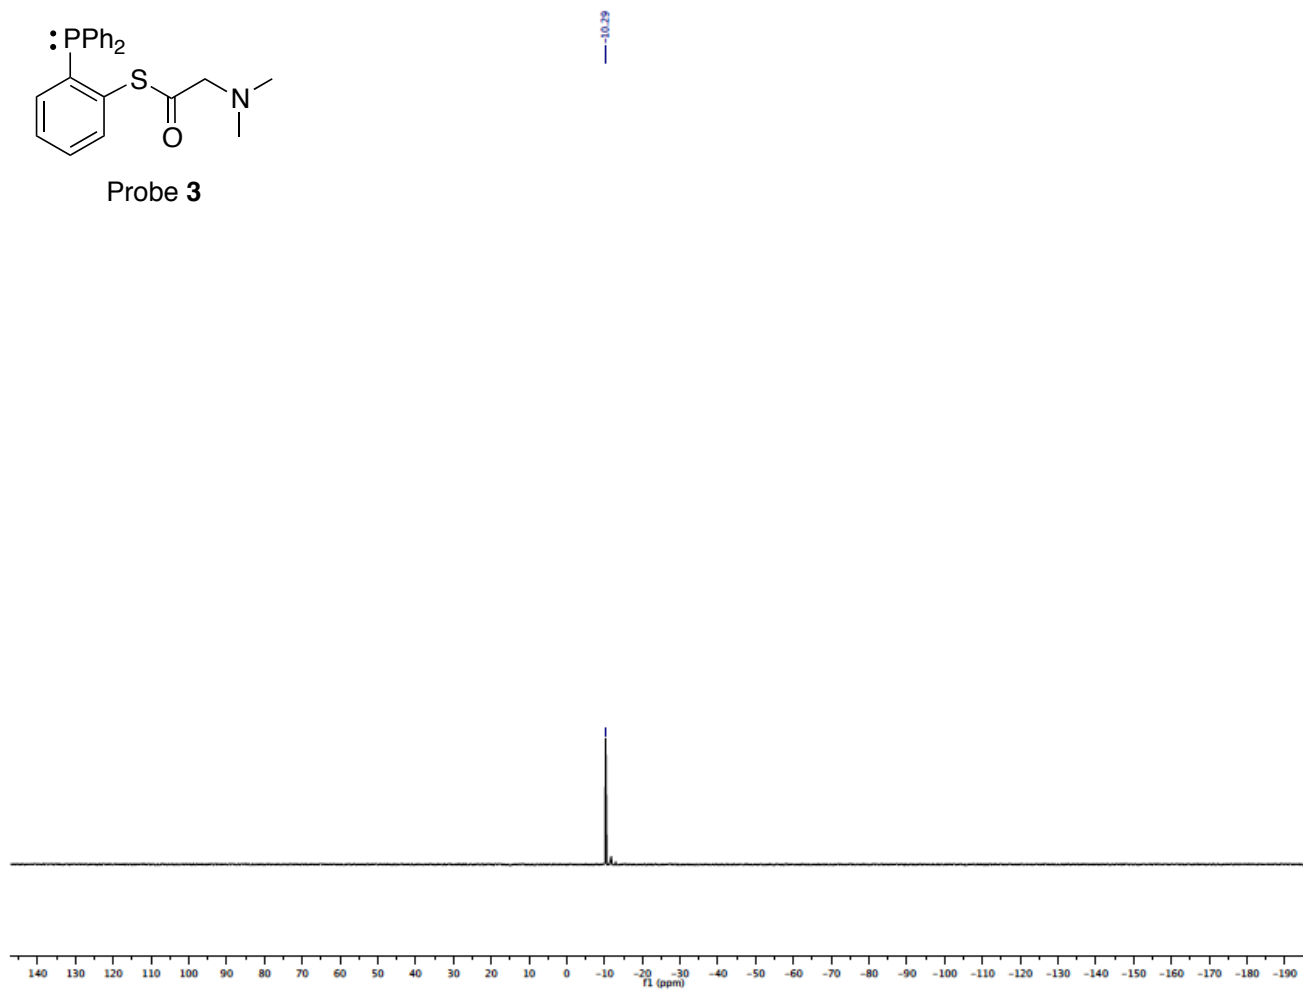

$^1\text{H}$  NMR

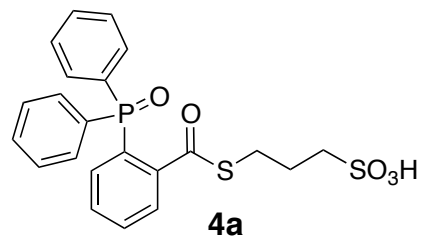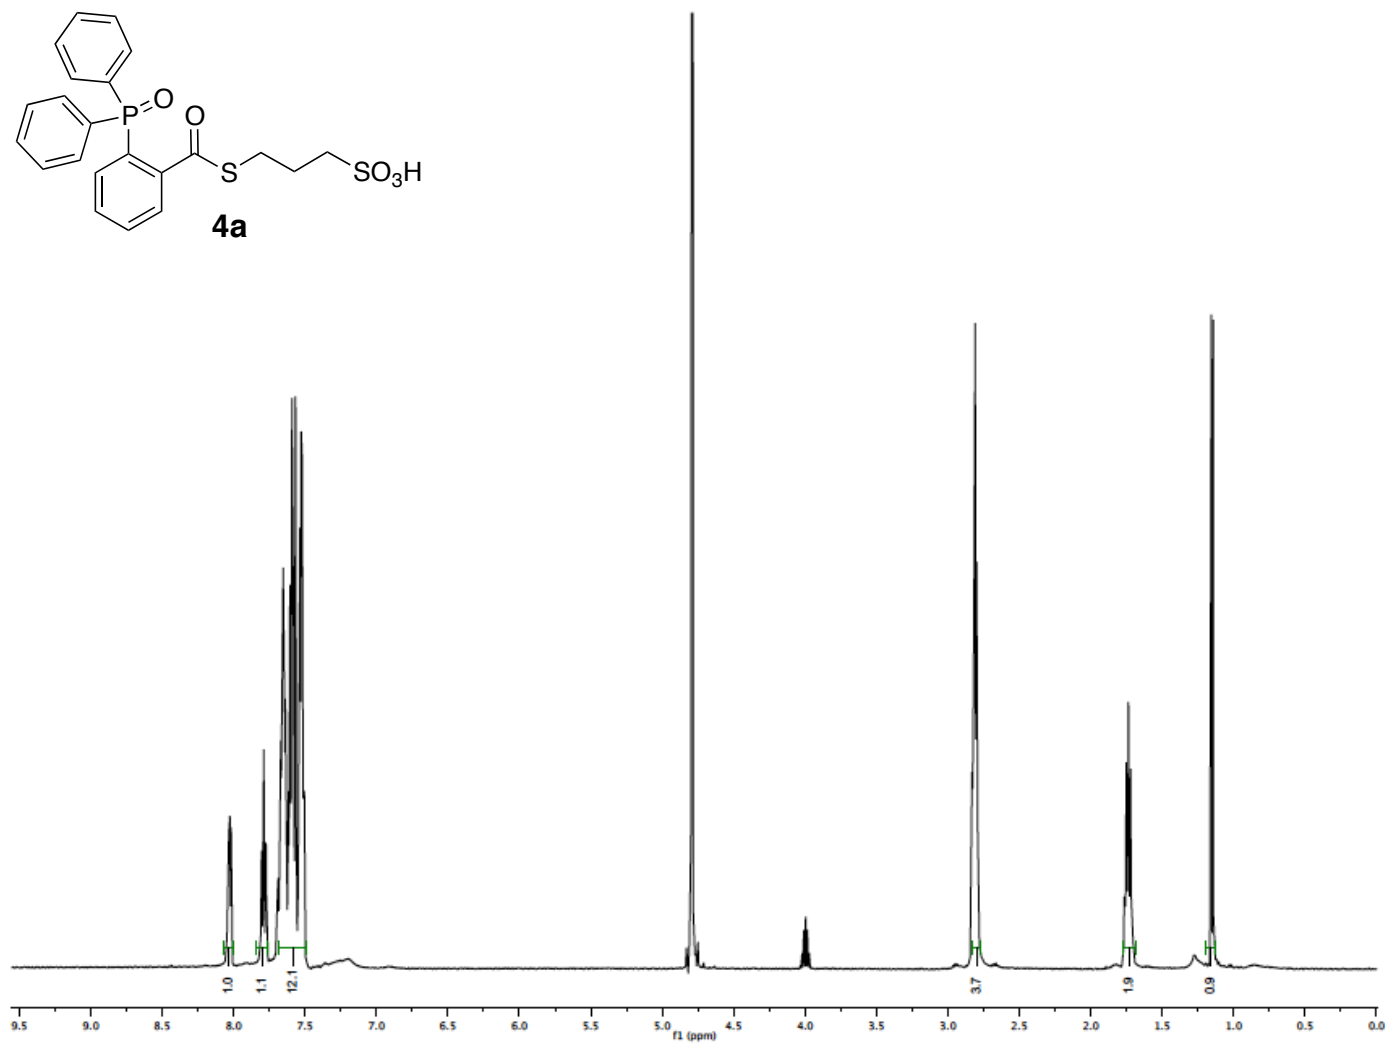

$^{31}\text{P}$  NMR

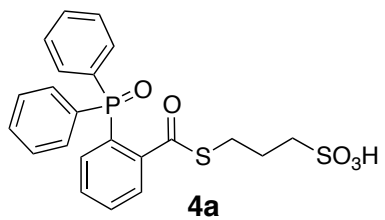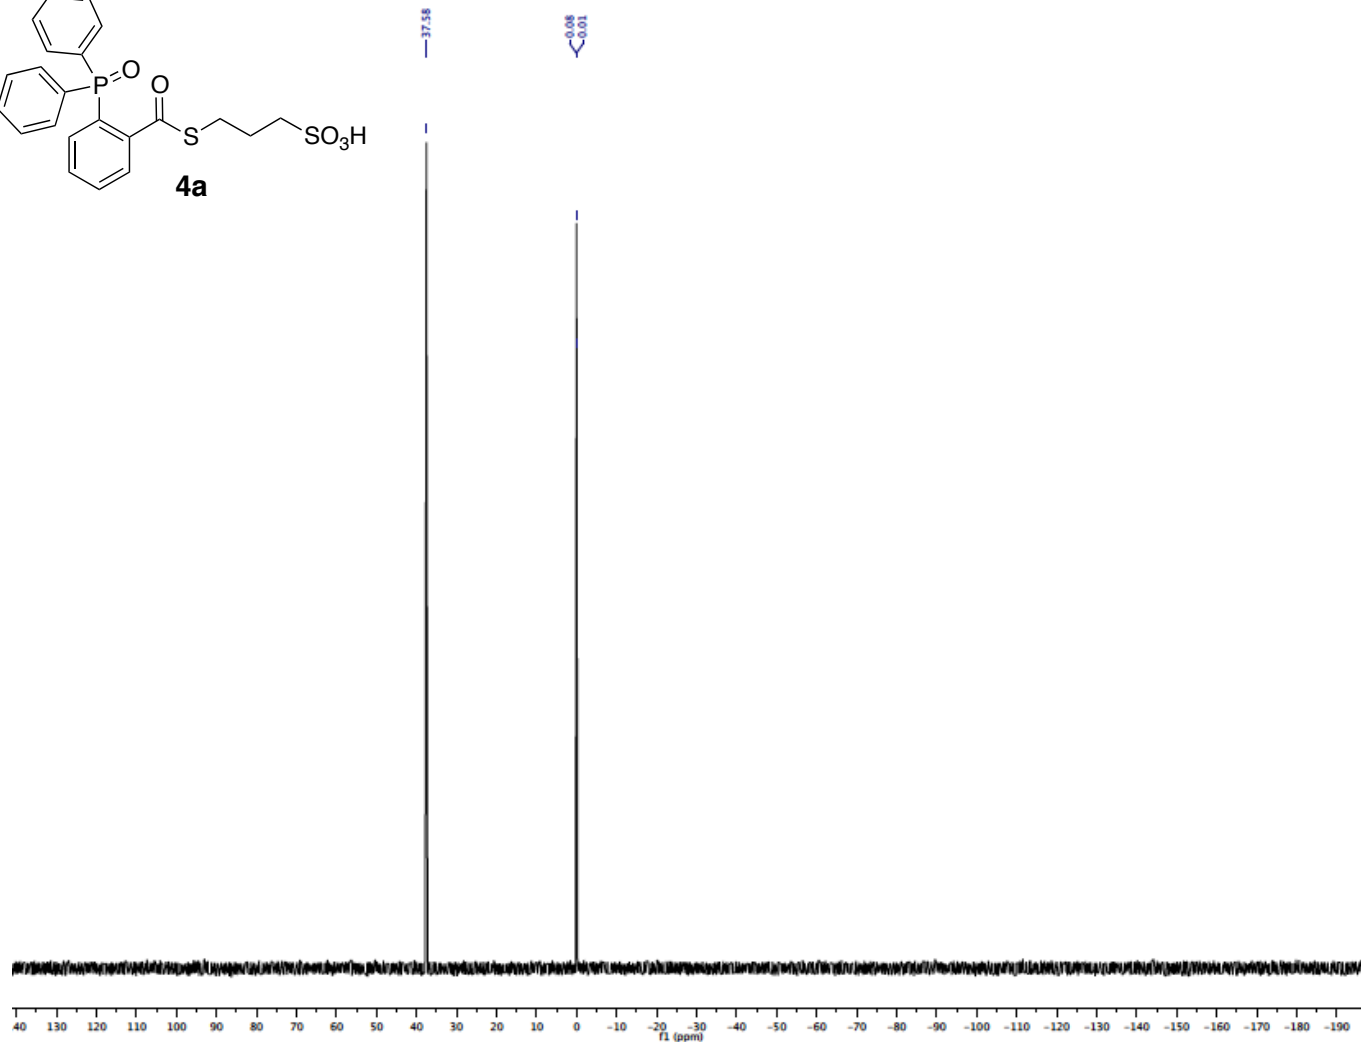

$^1\text{H}$  NMR

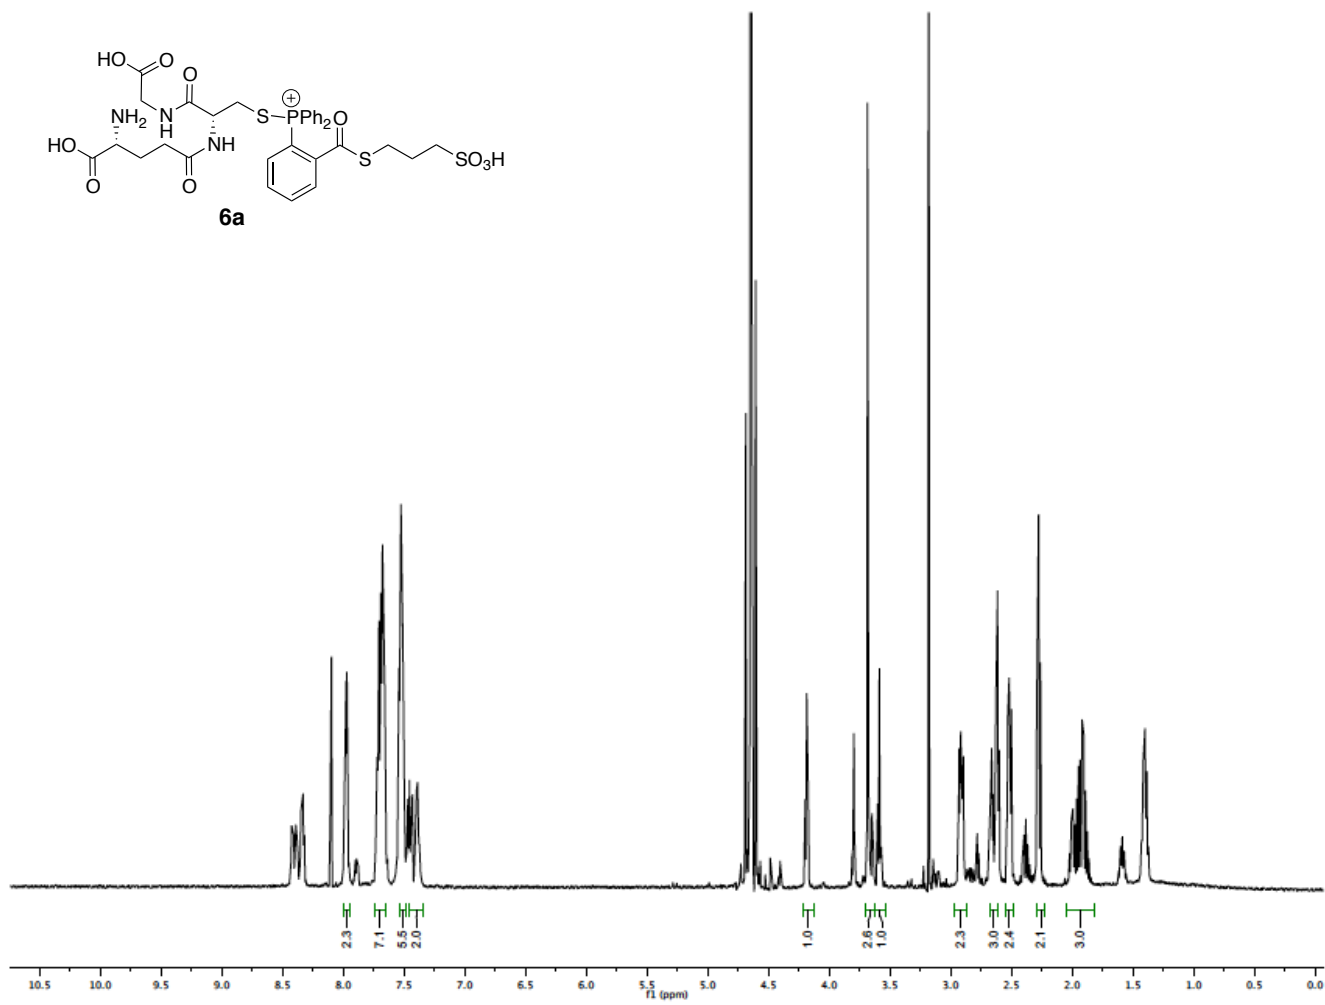

$^{31}\text{P}$  NMR

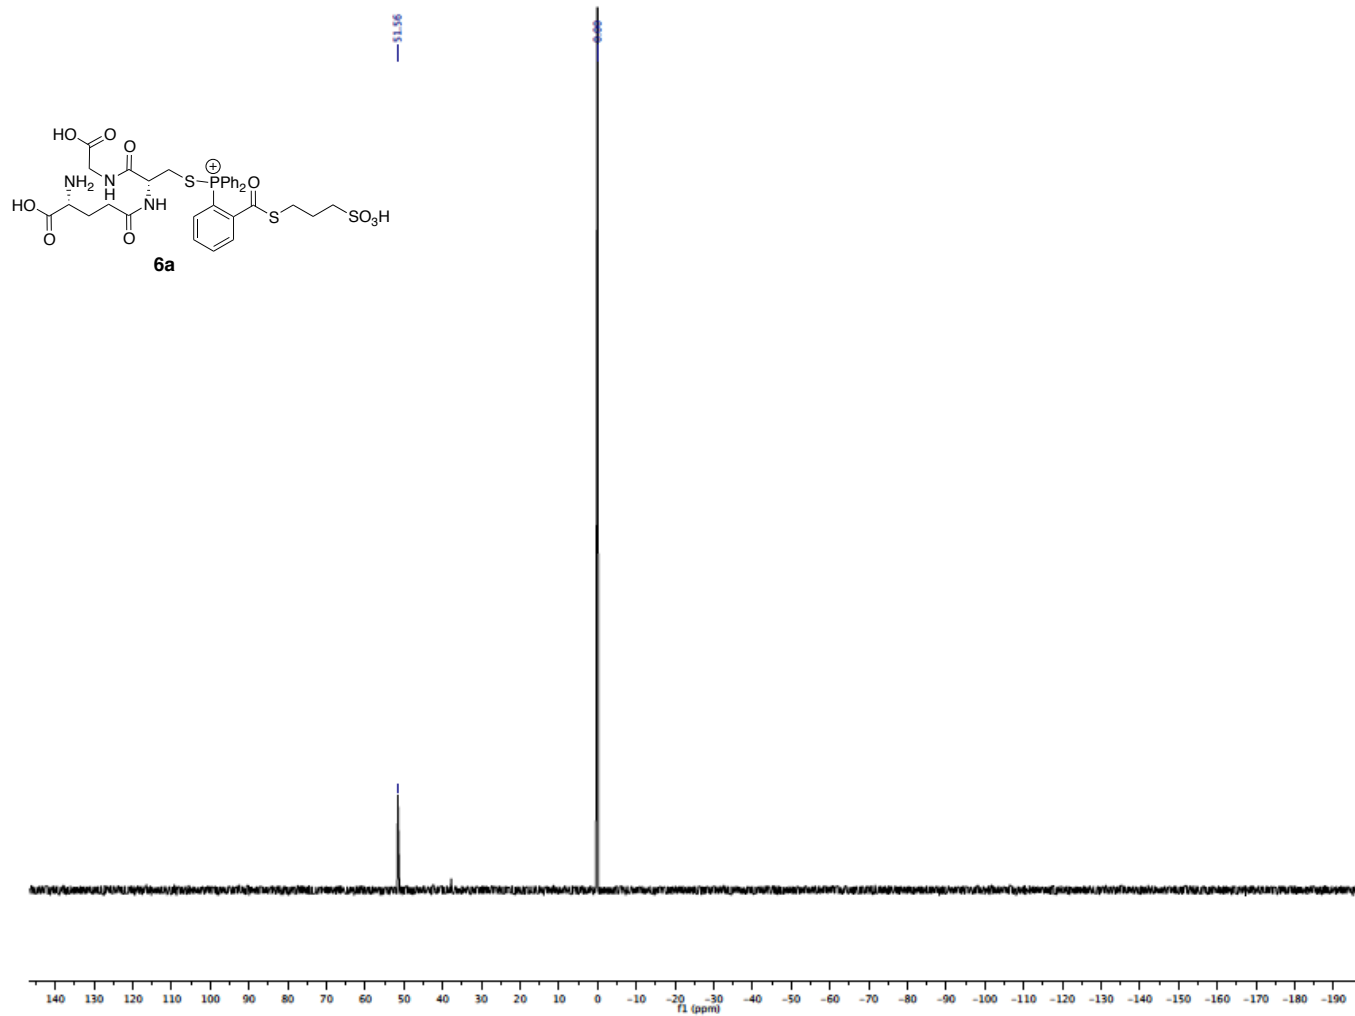

$^1\text{H}$  NMR

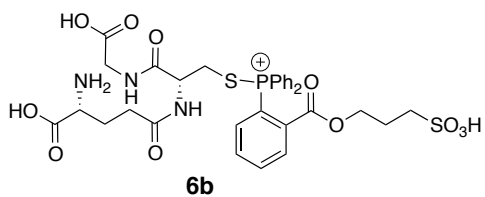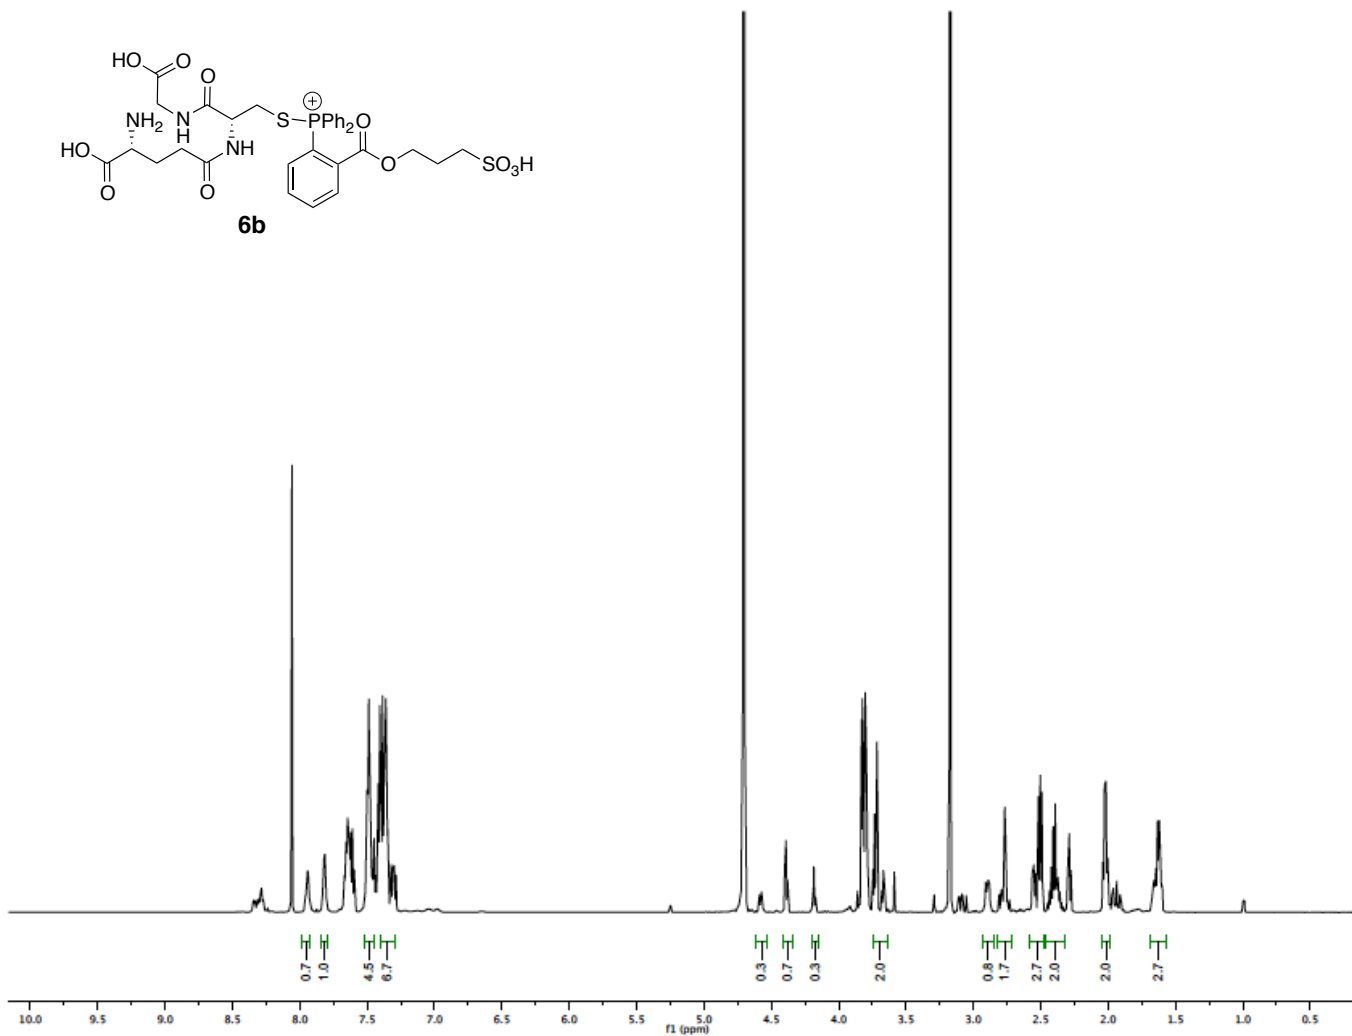

$^{31}\text{P}$  NMR

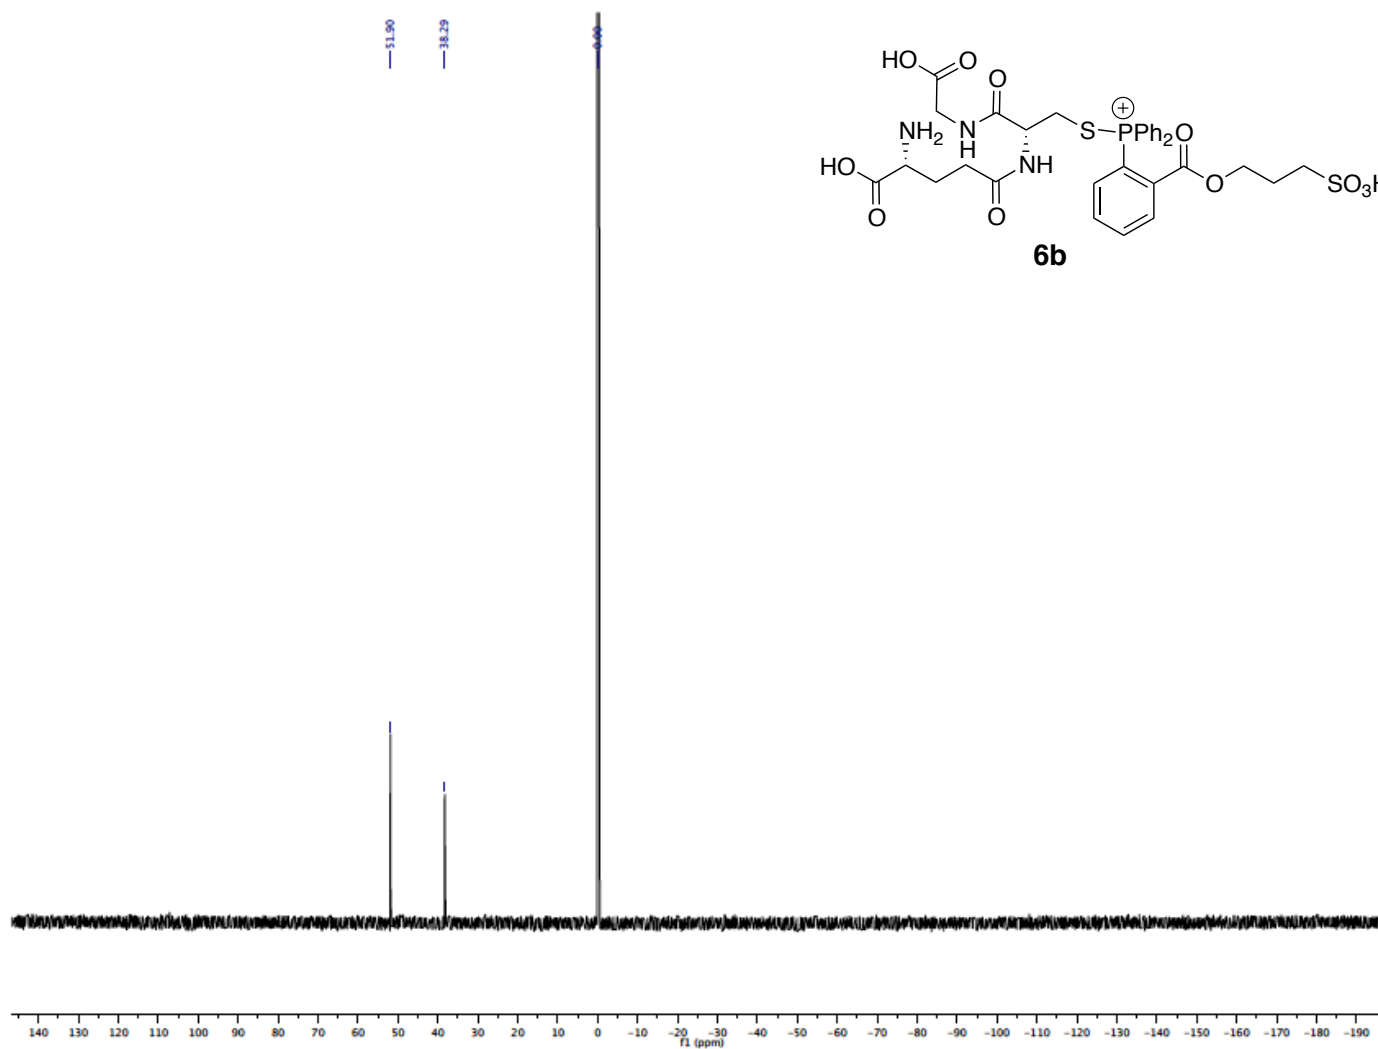

$^1\text{H}$  NMR

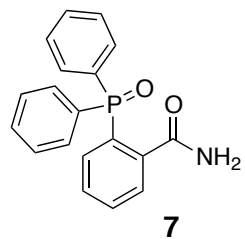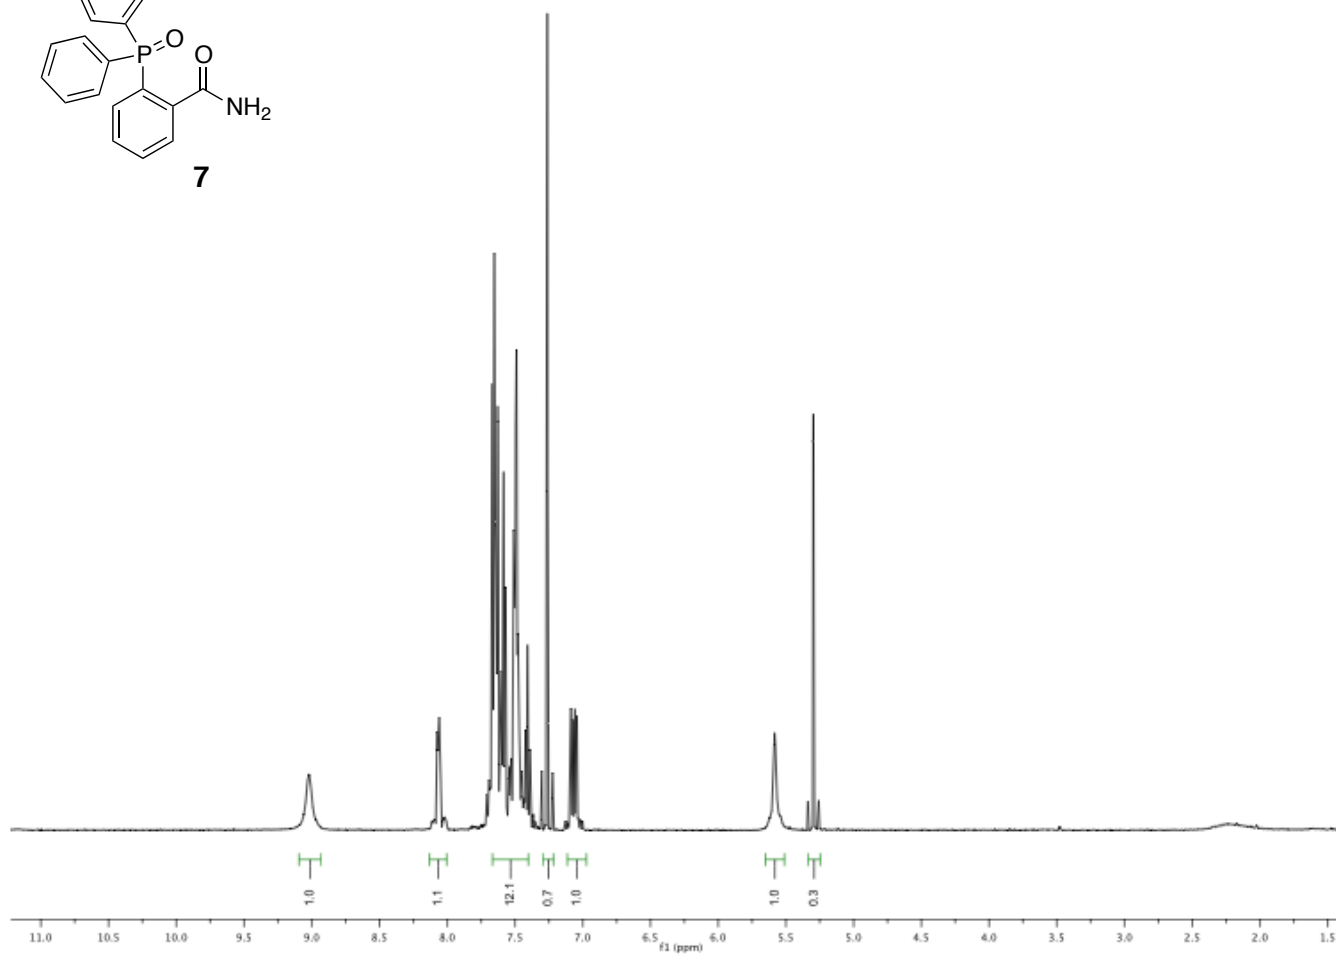



$^{31}\text{P}$  NMR

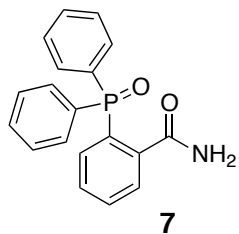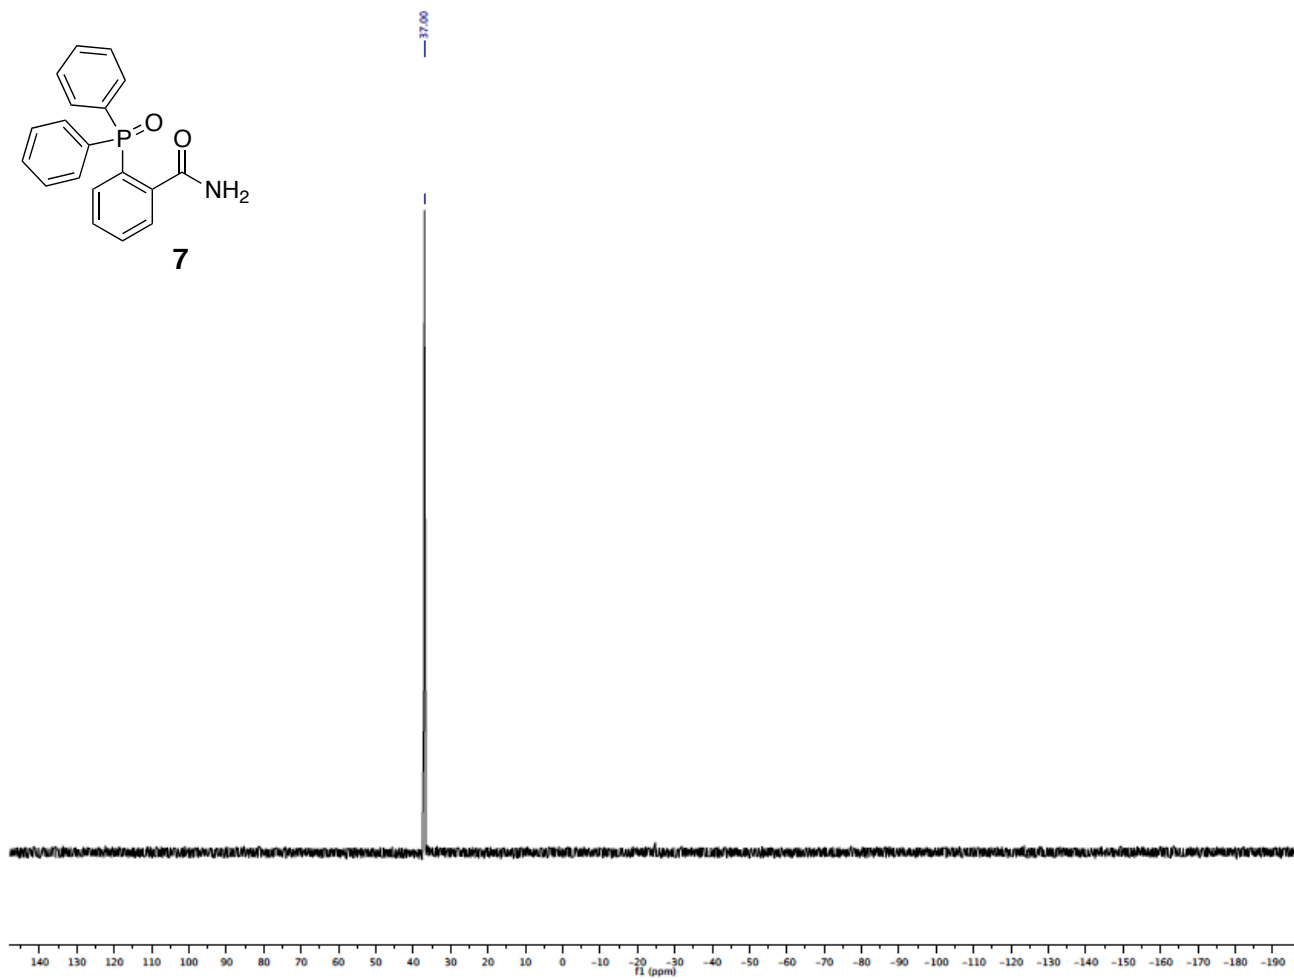

$^1\text{H}$  NMR

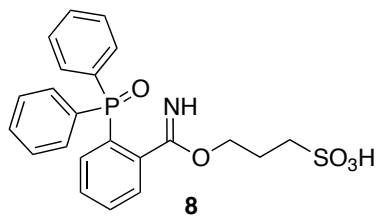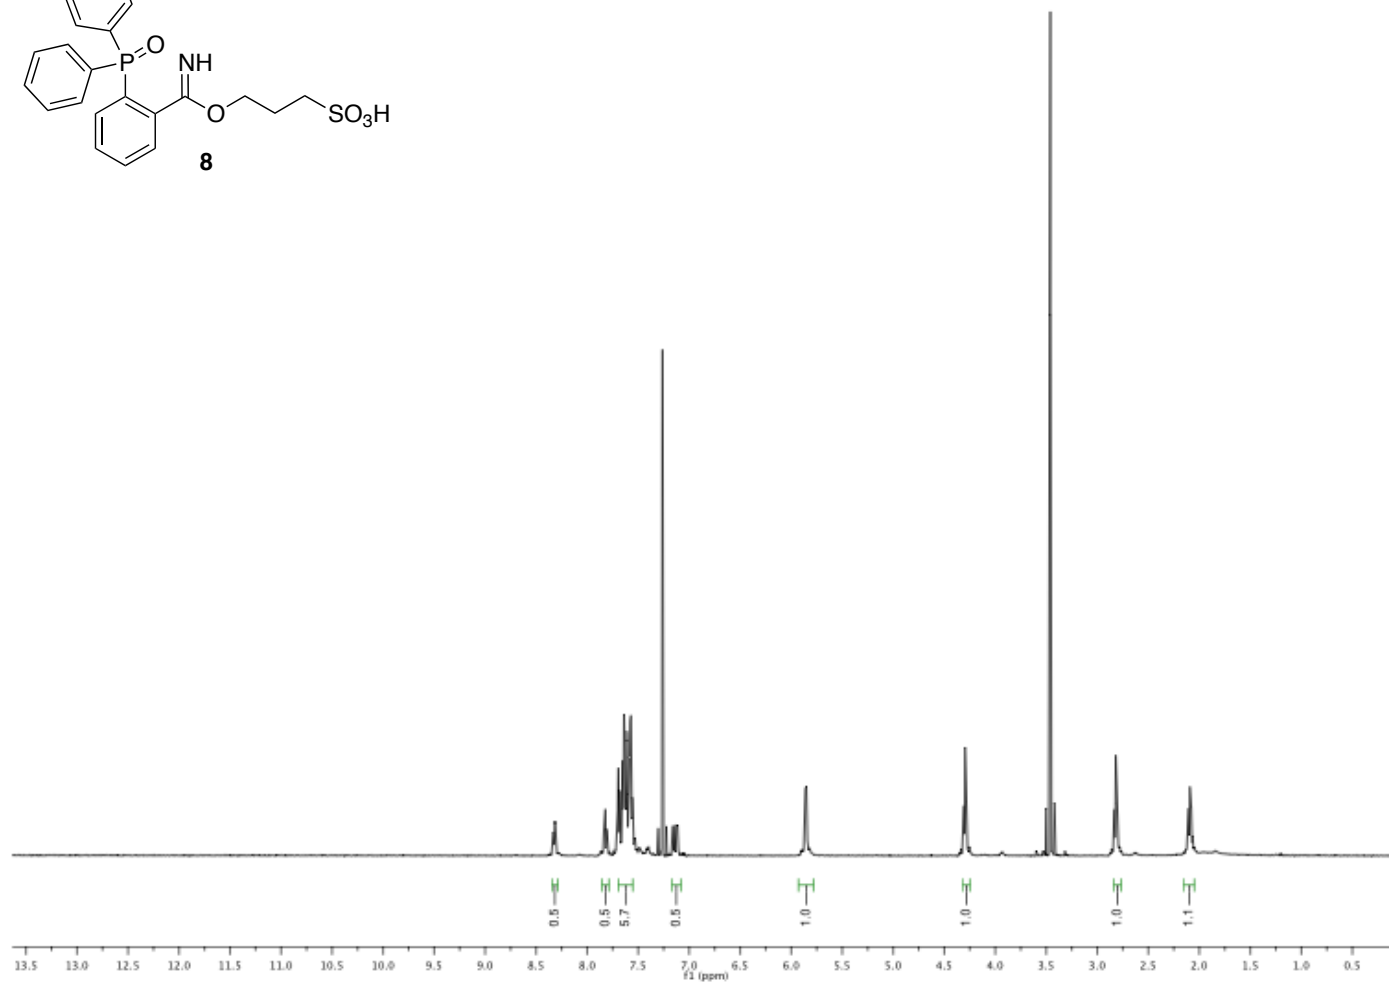

$^{13}\text{C}$  NMR

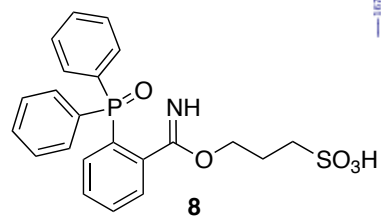

167.44

136.87

134.48

131.62

129.70

127.32

126.46

124.07

66.37

51.27

48.03

21.00

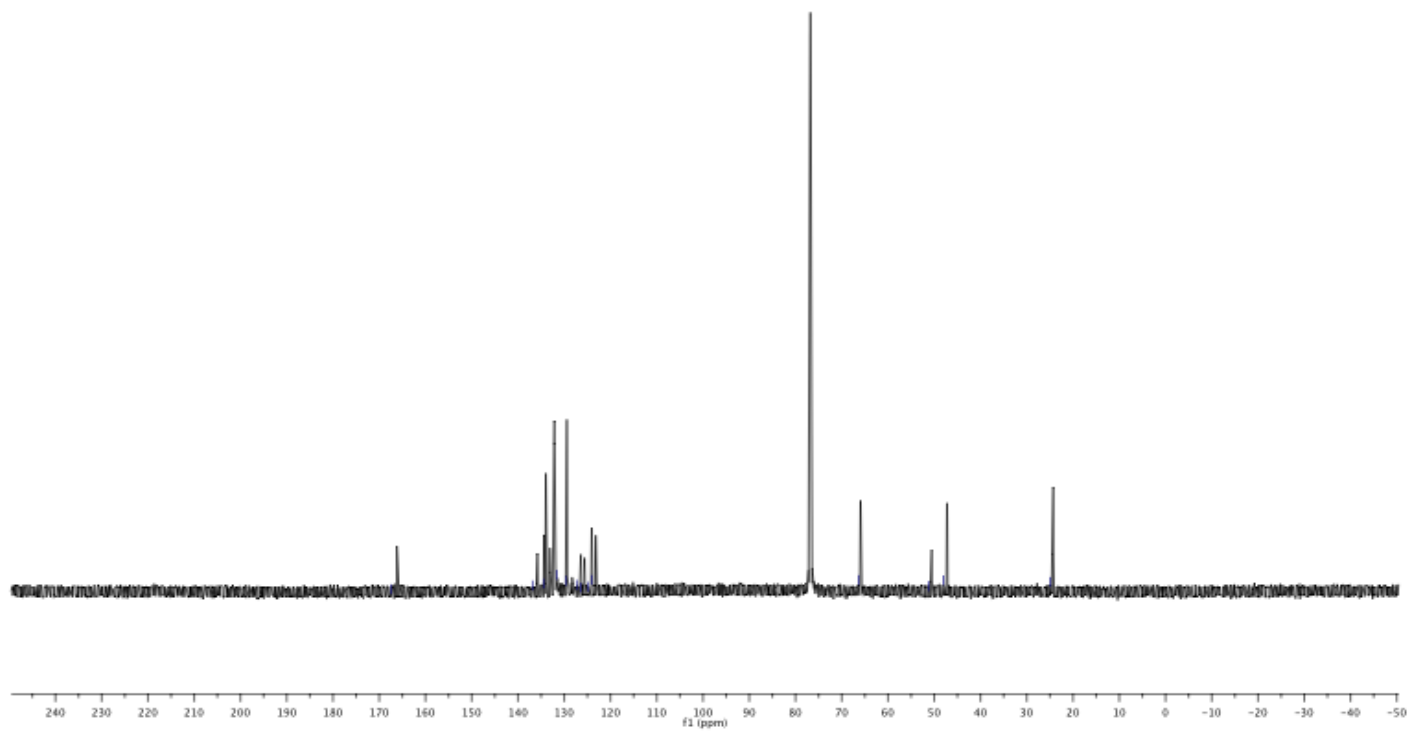

$^{31}\text{P}$  NMR

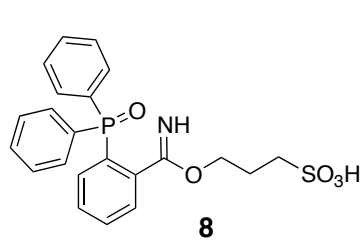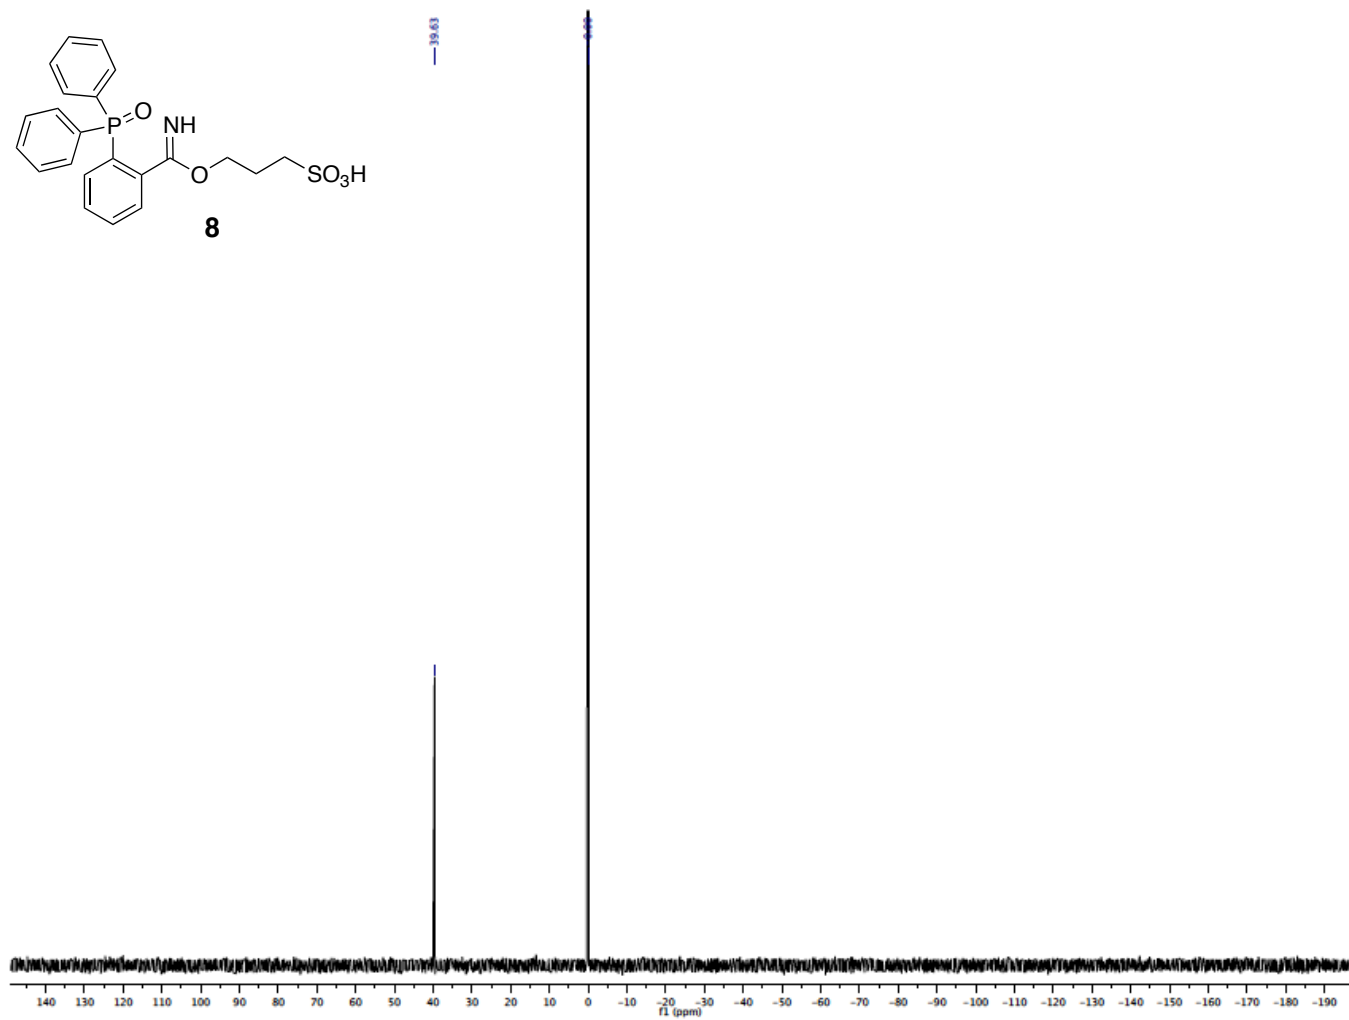

$^1\text{H}$  NMR

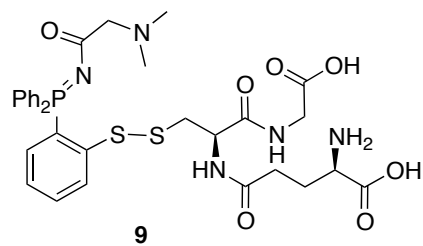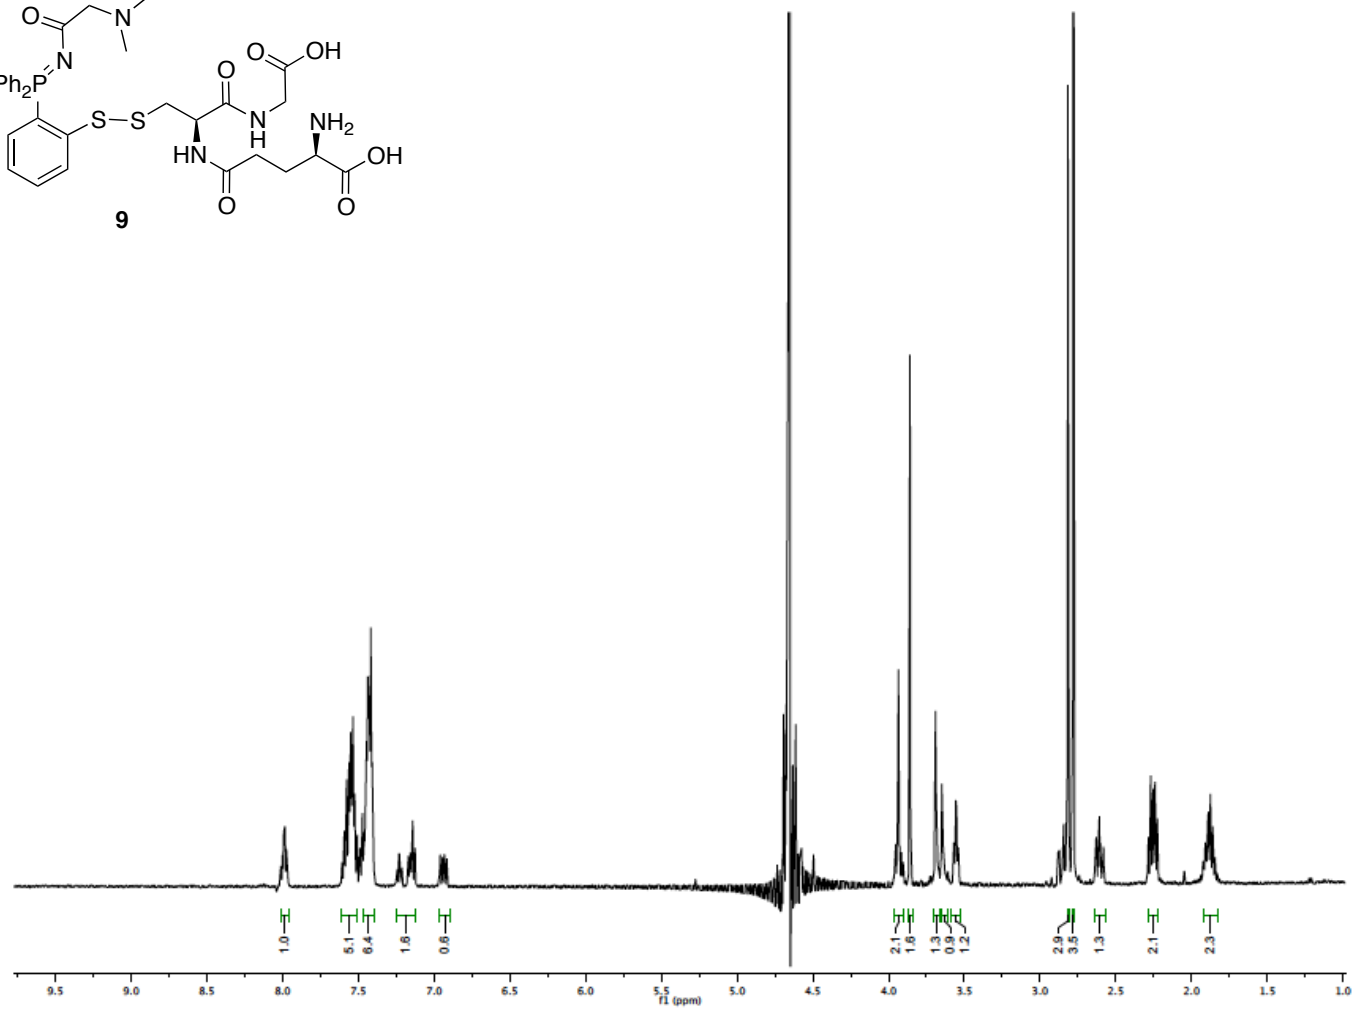

$^{13}\text{C}$  NMR

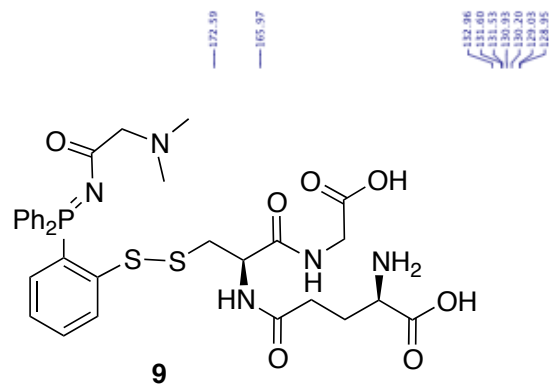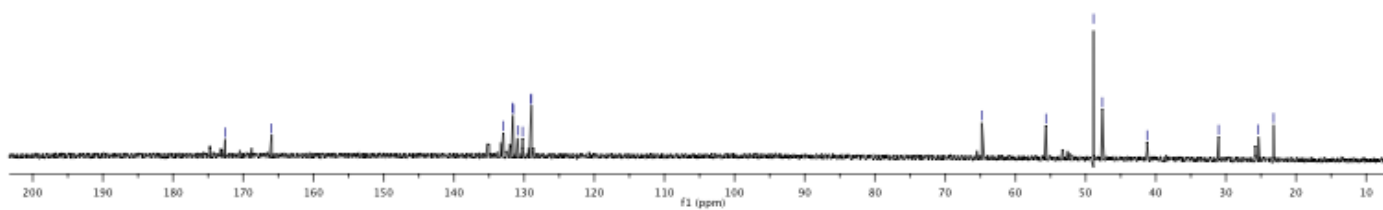

$^{31}\text{P}$  NMR

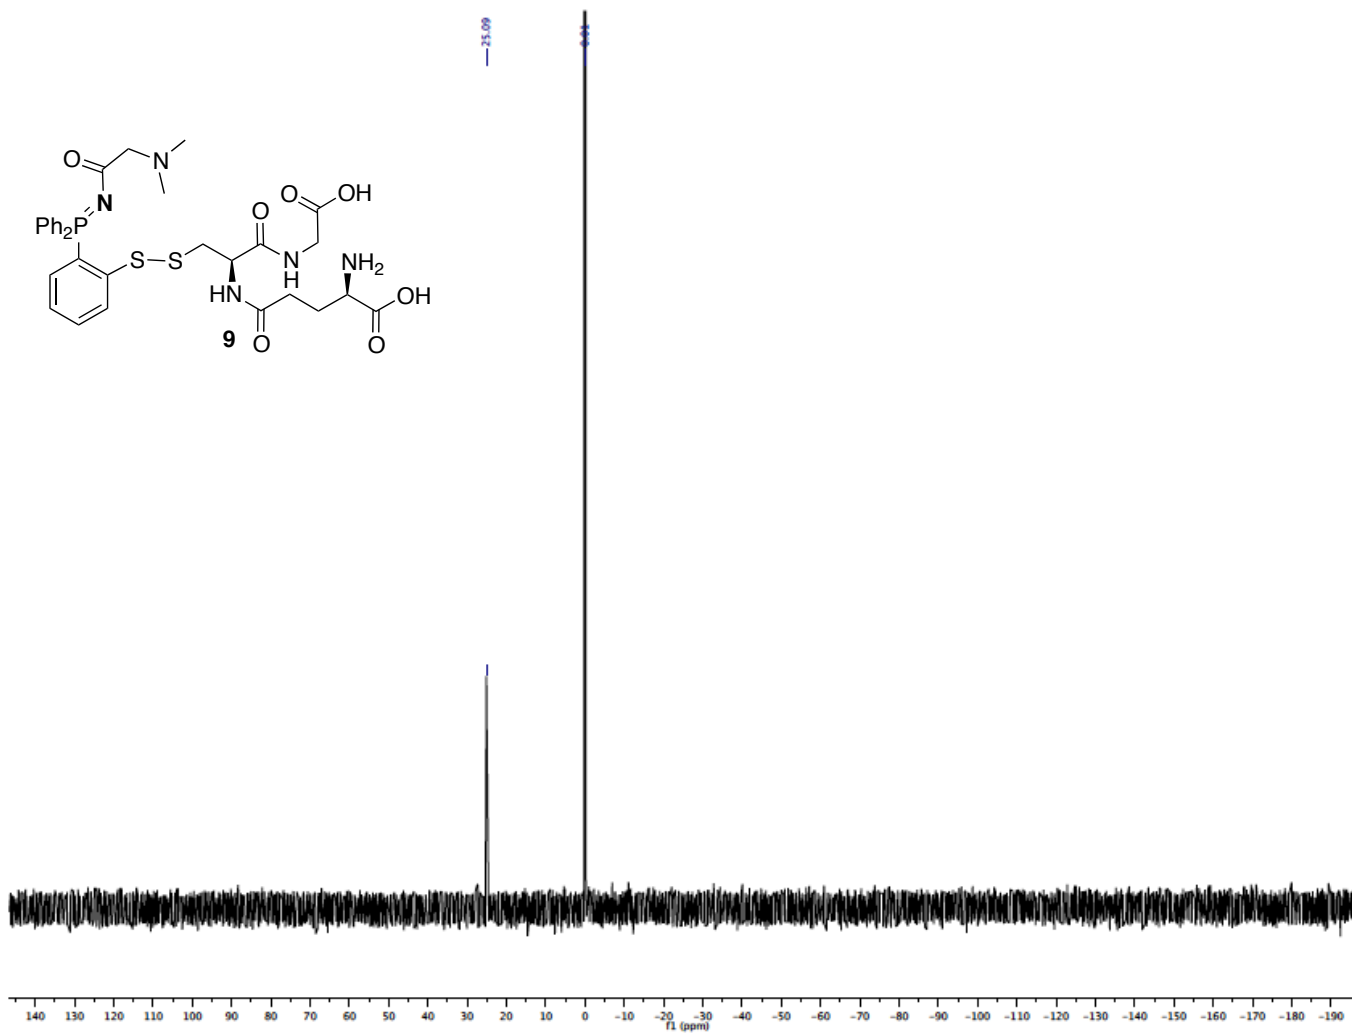

Supplement: ja401565w_si_002.pdf [file ja401565w_si_002.pdf]
